# Supplementary material for: Medium Bandgap Polymers for Efficient Non-Fullerene Polymer Solar Cells—An In-Depth Study of Structural Diversity of Polymer Structure
Source: MDPI journal article supplement (doi:10.3390/ijms24010522), 2022-12-28
Supplement: s1 [file s1]

## Supplementary Materials

# Medium Bandgap Polymers for Efficient Non-Fullerene Polymer Solar Cells—An In-Depth Study of Structural Diversity of Polymer Structure

Shimiao Zhang <sup>1</sup>, Dong Hwan Son <sup>2,3</sup>, Rahmatia Fitri Binti Nasrun <sup>2,3</sup>, Sabrina Aufar Salma <sup>2,3</sup>,  
Hongsuk Suh <sup>1,\*</sup> and Joo Hyun Kim <sup>2,3,\*</sup>

<sup>1</sup> Department of Chemistry and Chemistry Institute for Functional Materials, Pusan National University (PNU), Busan 46241, Republic of Korea

<sup>2</sup> CECS Research Institute, Core Research Institute, Busan 48513, Republic of Korea

<sup>3</sup> Department of Polymer Engineering, Pukyong National University, Busan 48513, Republic of Korea

\* Correspondence: hssuh@pusan.ac.kr (H.S.); jkim@pknu.ac.kr (J.H.K.)

**Keywords:** non-fullerene acceptor; indandione; polymer solar cell; thiophene bridges; inverted solar cell

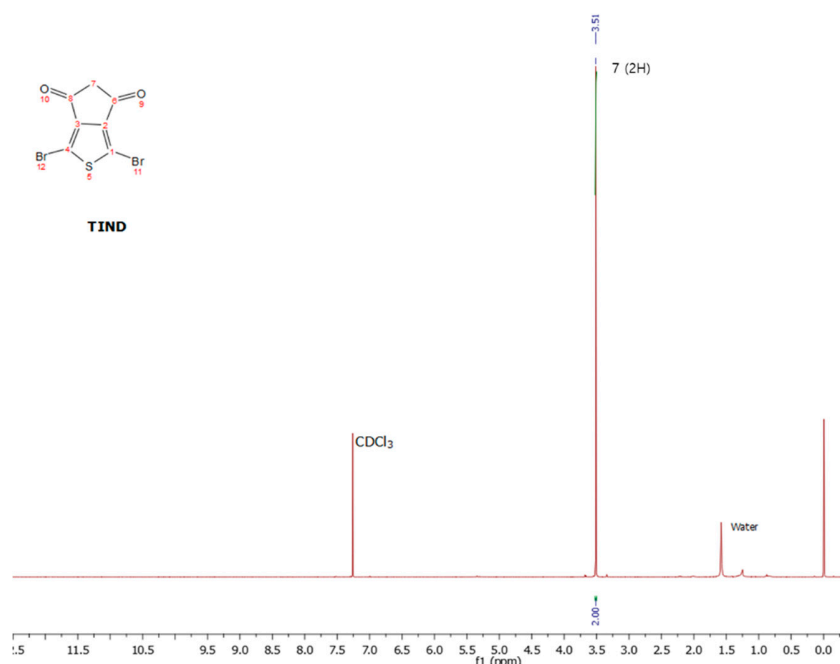

**Figure S1.** (<sup>1</sup>H NMR spectrum of compound IND).

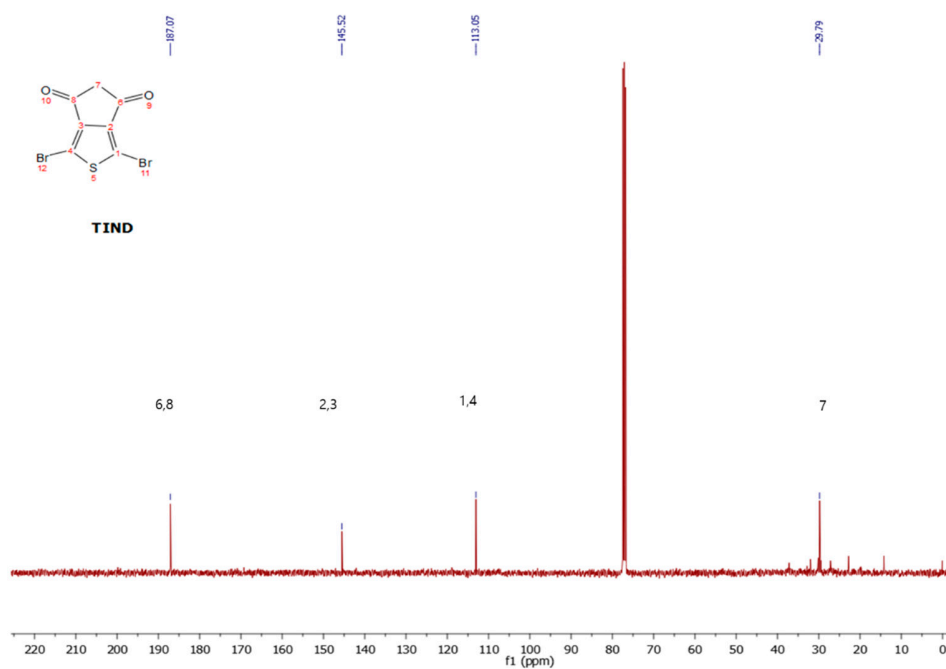

**Figure S2.** ( $^{13}\text{C}$  NMR spectrum of compound **IND**).

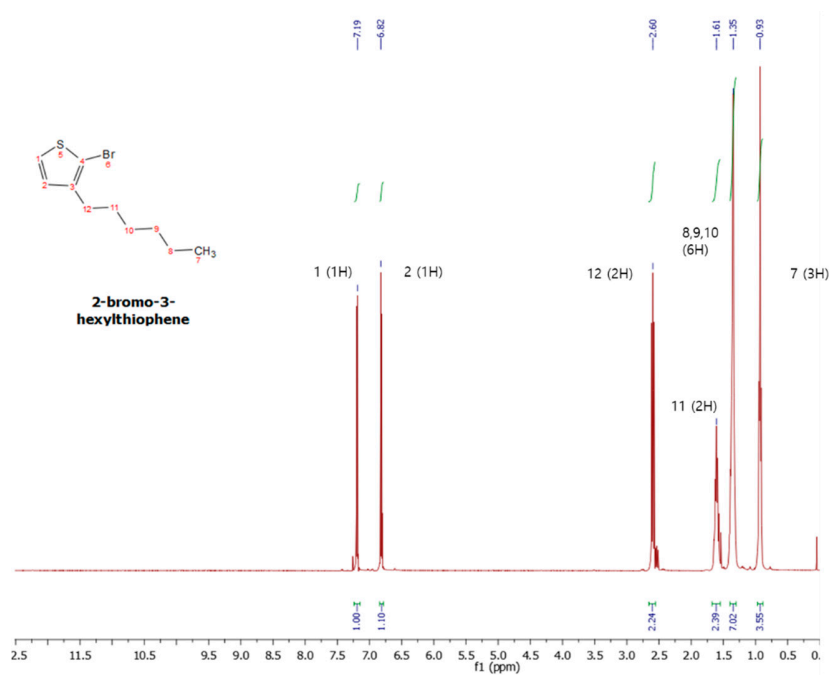

**Figure S3.** ( $^1\text{H}$  NMR spectrum of compound **2**).

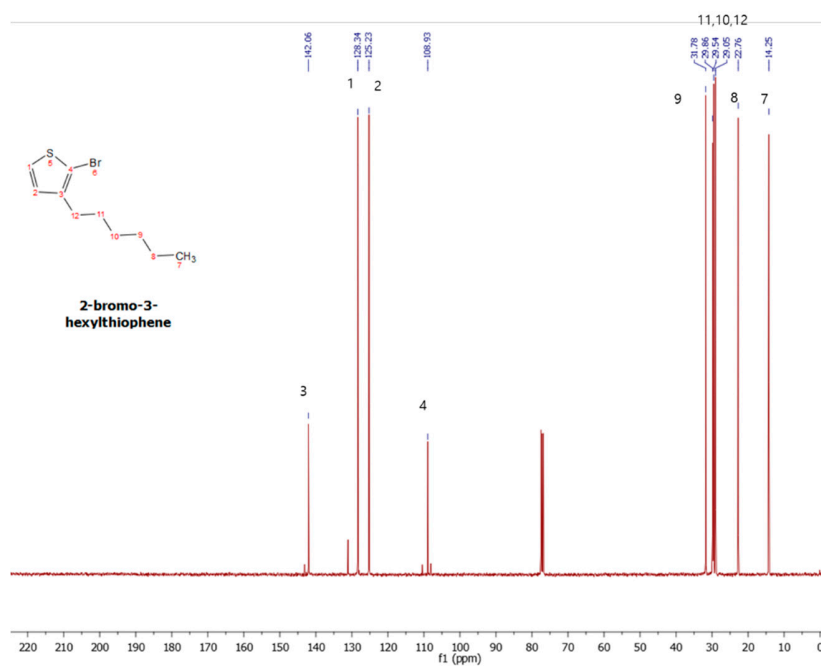

**Figure S4.** ( $^{13}\text{C}$  NMR spectrum of compound **2**).

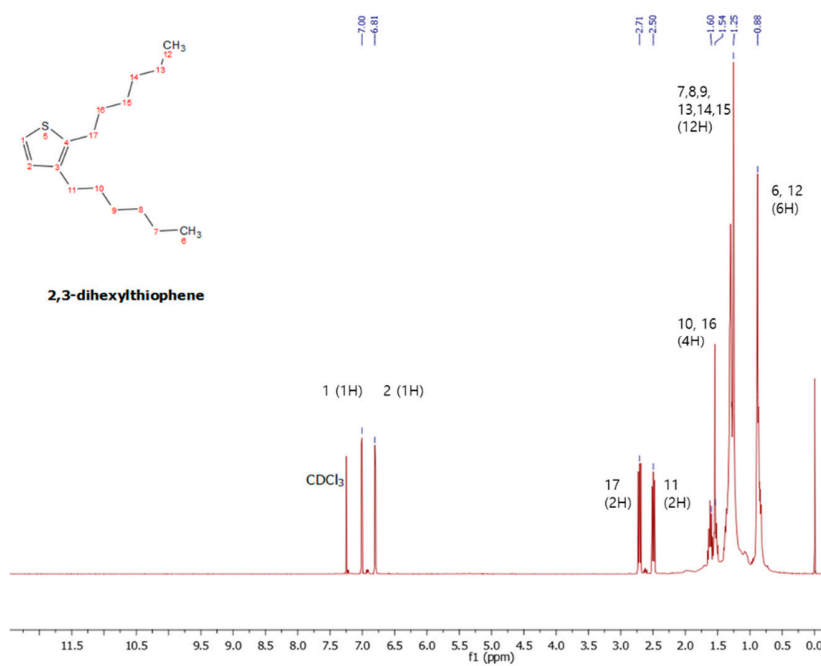

**Figure S5.** ( $^1\text{H}$  NMR spectrum of compound **3**).

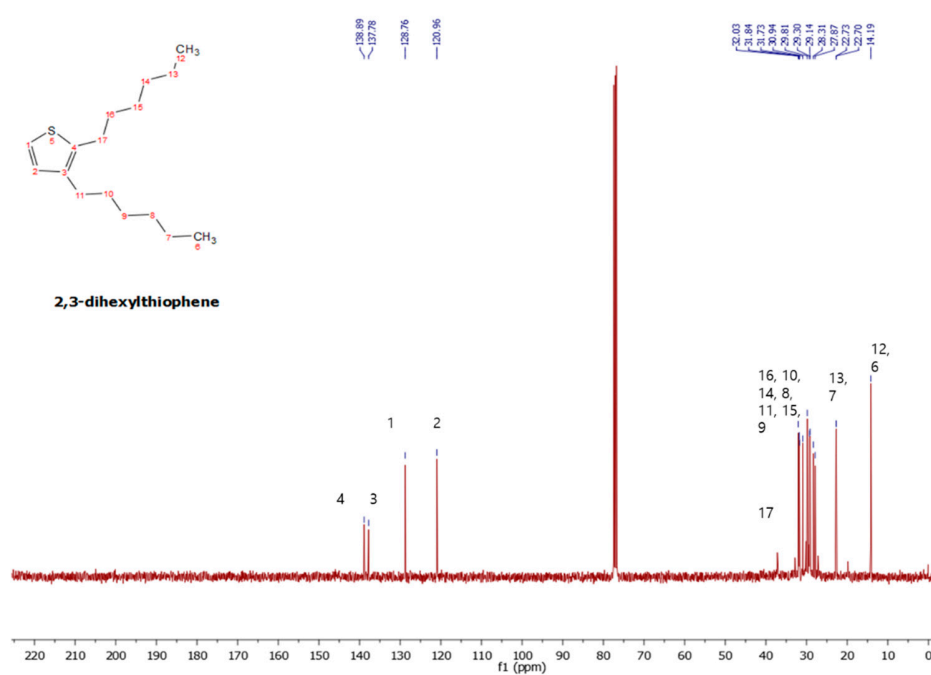

**Figure S6.** ( $^{13}\text{C}$  NMR spectrum of compound **3**).

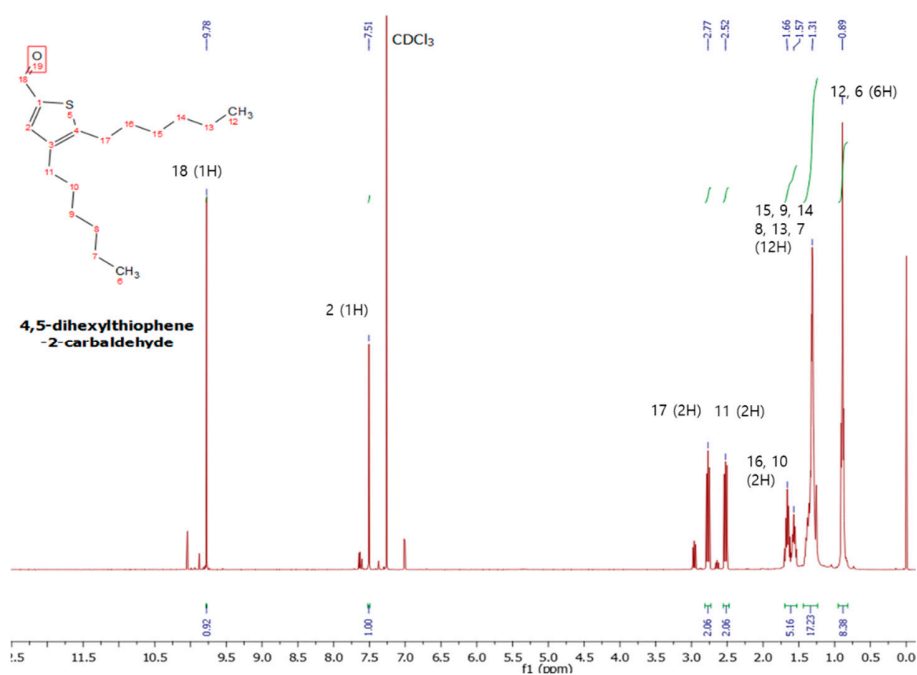

**Figure S7.** ( $^1\text{H}$  NMR spectrum of compound **4**).

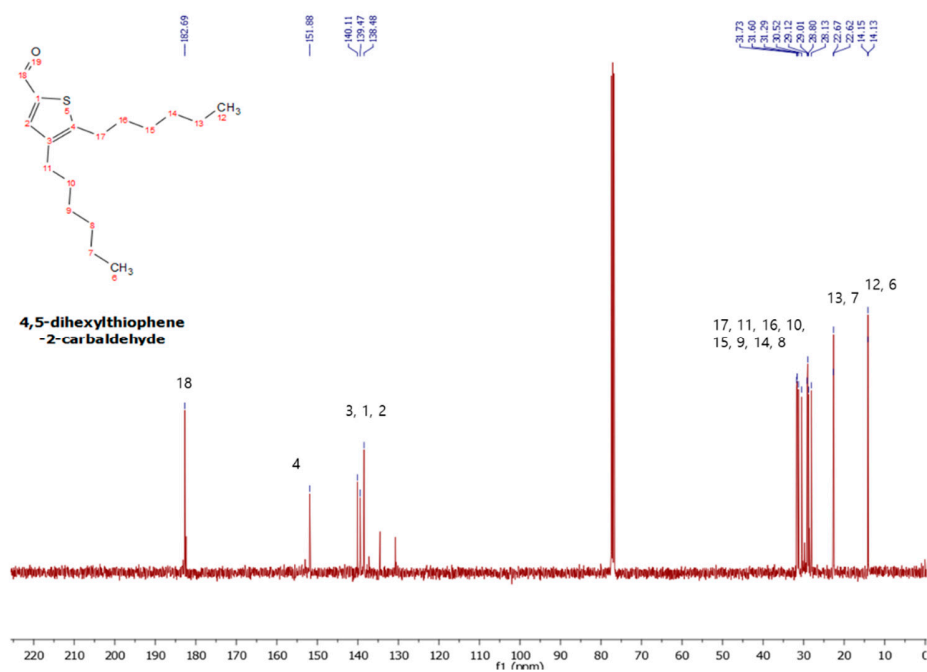

**Figure S8.** ( $^{13}\text{C}$  NMR spectrum of compound 4).

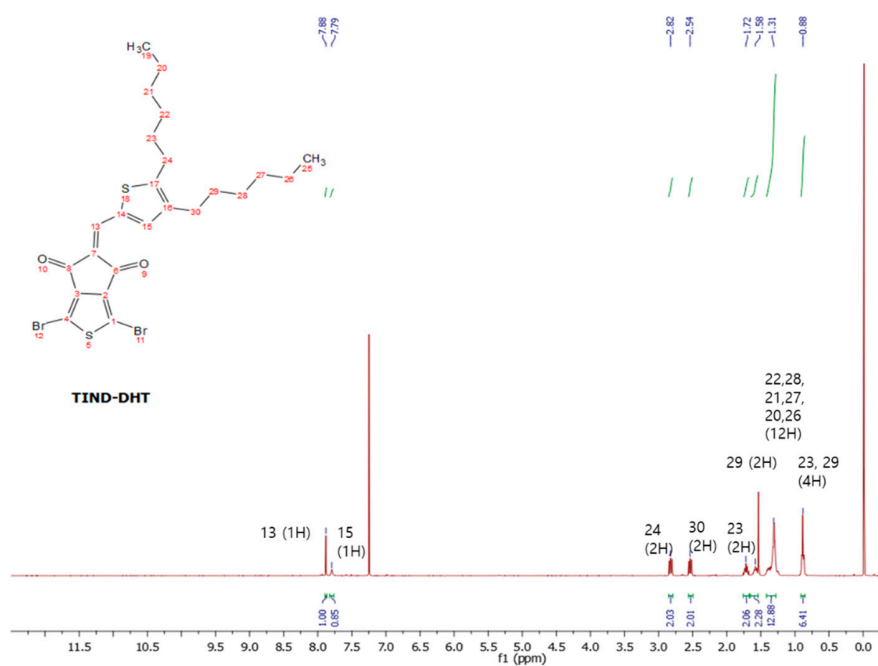

**Figure S9.** ( $^1\text{H}$  NMR spectrum of compound 5).

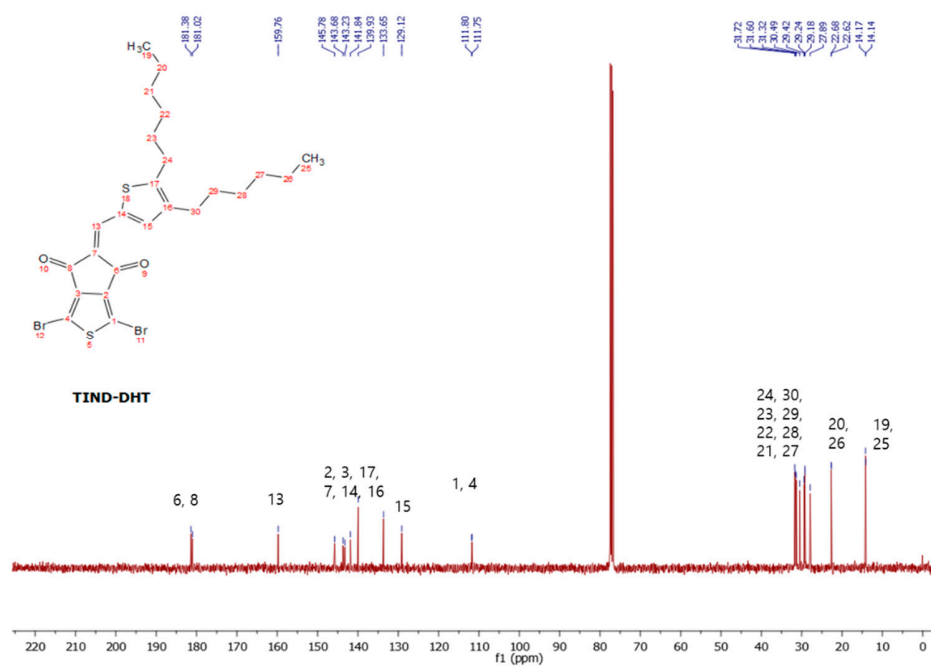

**Figure S10.** ( $^{13}\text{C}$  NMR spectrum of compound **5**).

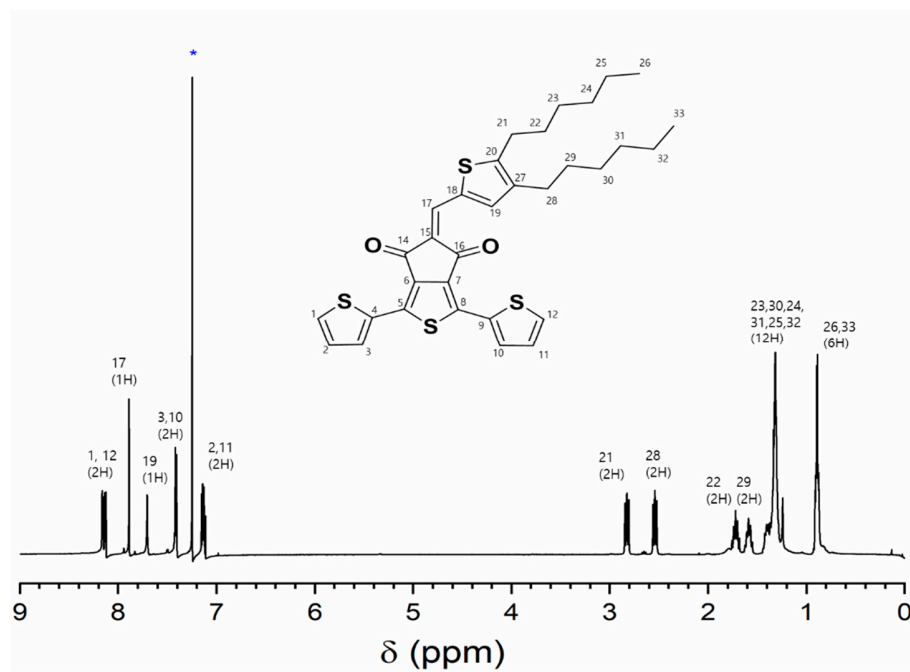

**Figure S11.** ( $^1\text{H}$  NMR spectrum of compound **6**).

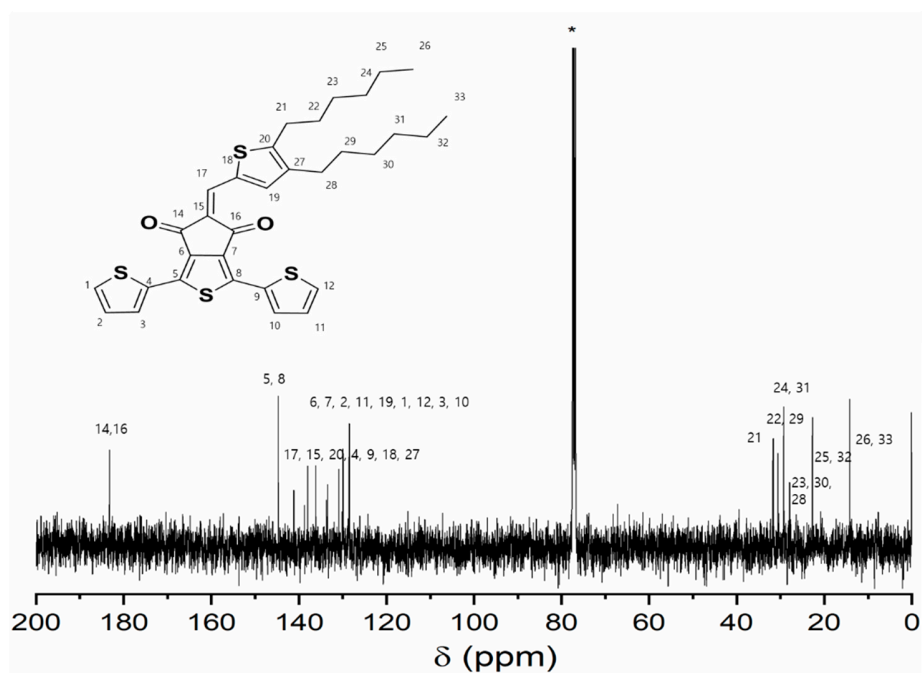

**Figure S12.** ( $^{13}\text{C}$  NMR spectrum of compound **6**).

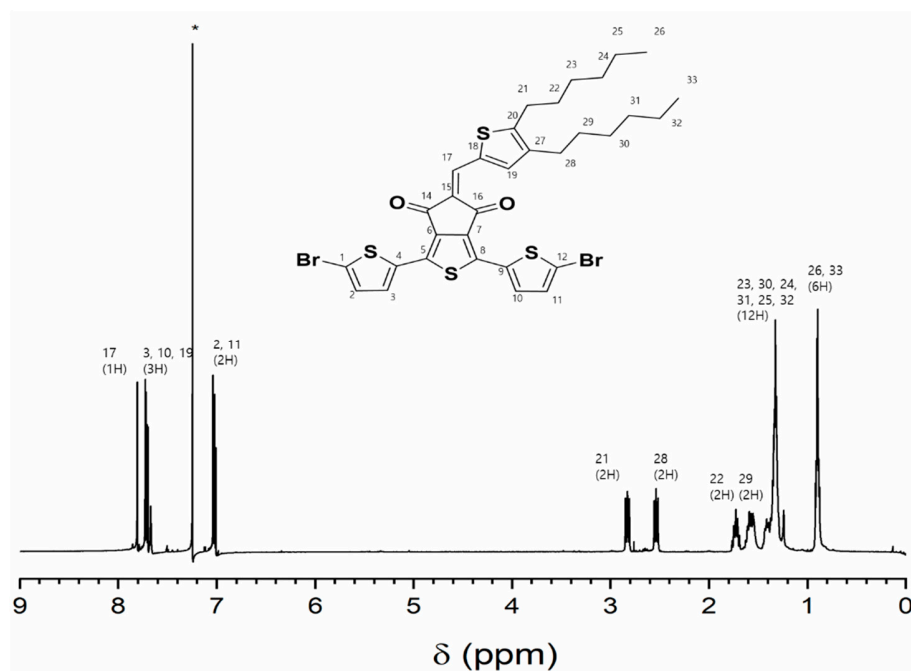

**Figure S13.** ( $^1\text{H}$  NMR spectrum of compound **M1**).

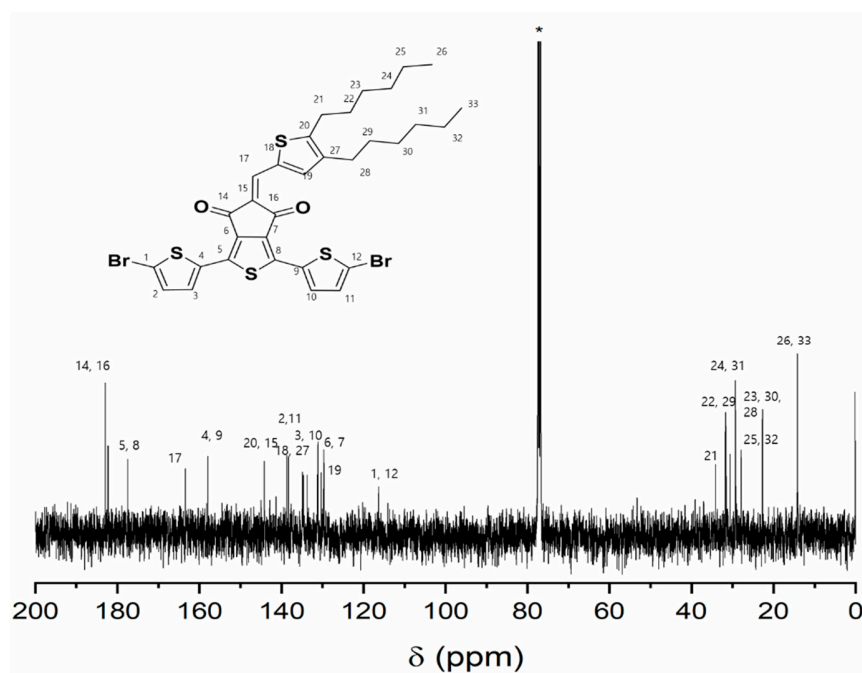

**Figure S14.** ( $^{13}\text{C}$  NMR spectrum of compound **M1**).

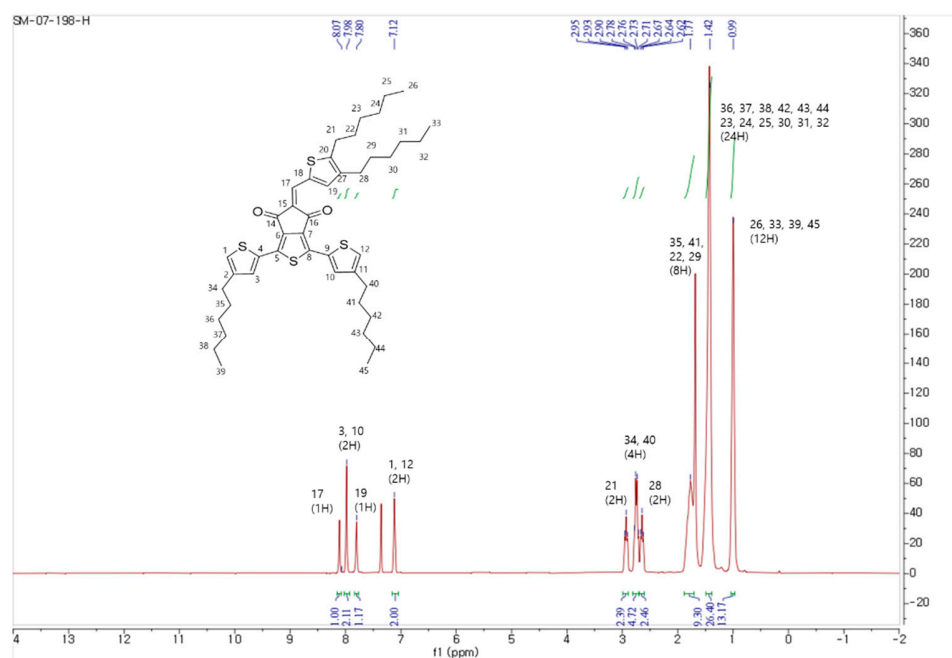

**Figure S15.** ( $^1\text{H}$  NMR spectrum of compound **7**).



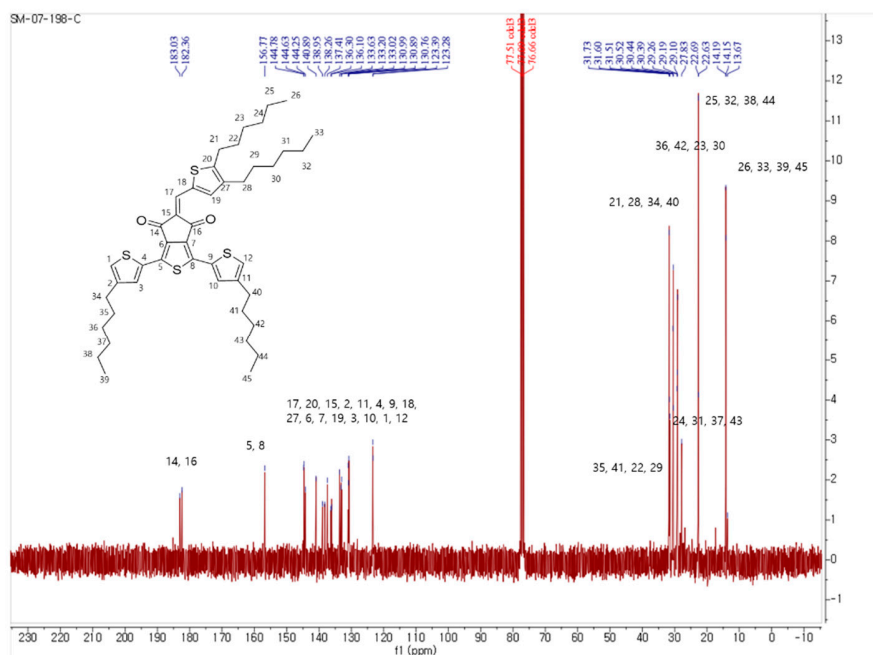

**Figure S16.** (<sup>13</sup>C NMR spectrum of compound 7).

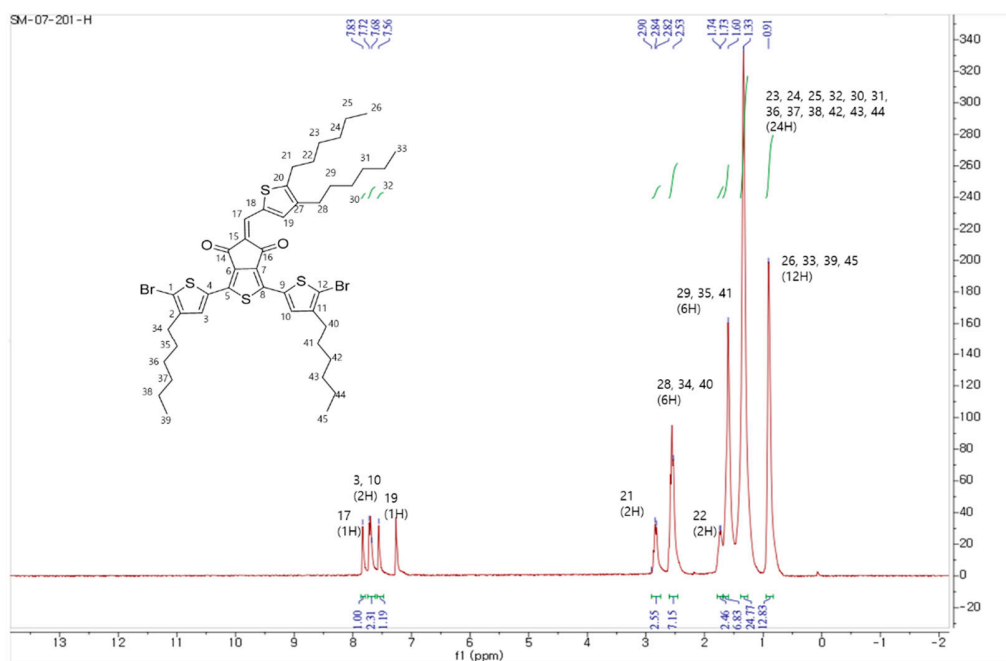

**Figure S17.** (<sup>1</sup>H NMR spectrum of compound M2).

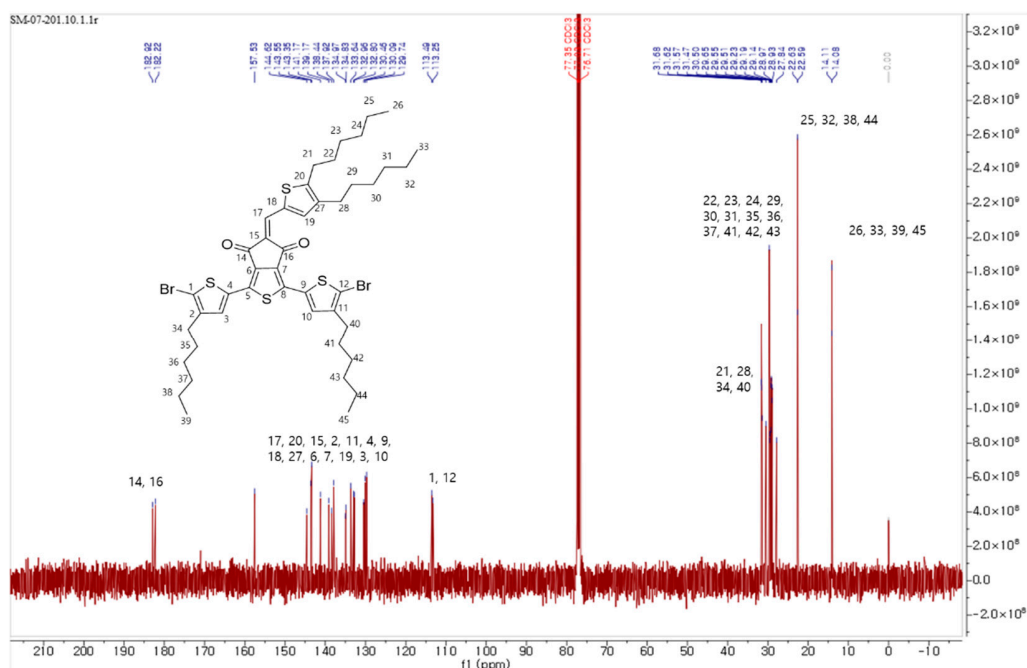

**Figure S18.** (<sup>13</sup>C NMR spectrum of compound M2).

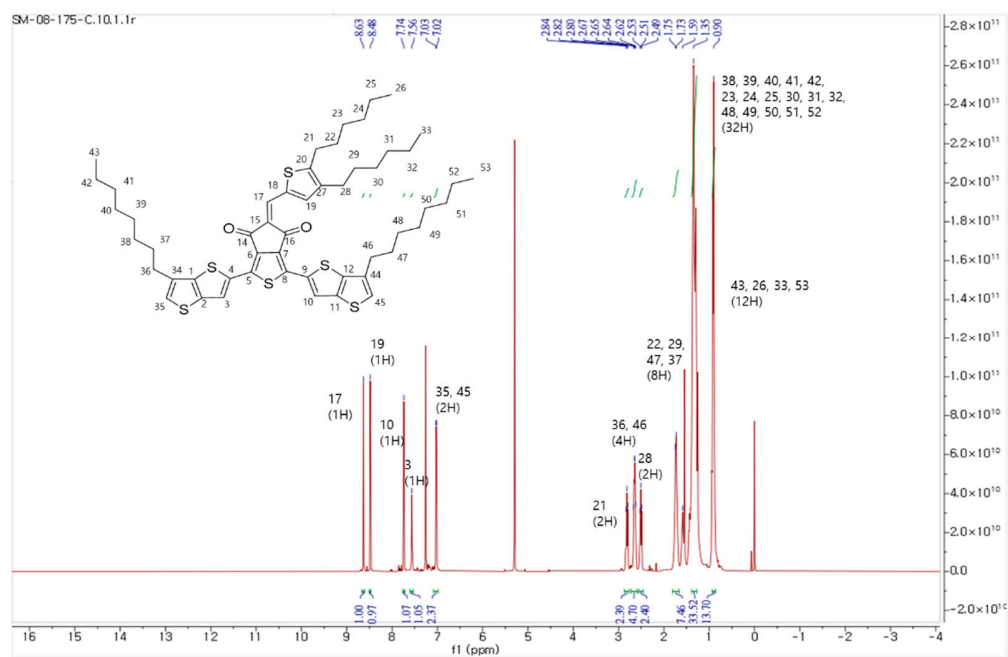

**Figure S19.** (<sup>1</sup>H NMR spectrum of compound 8).

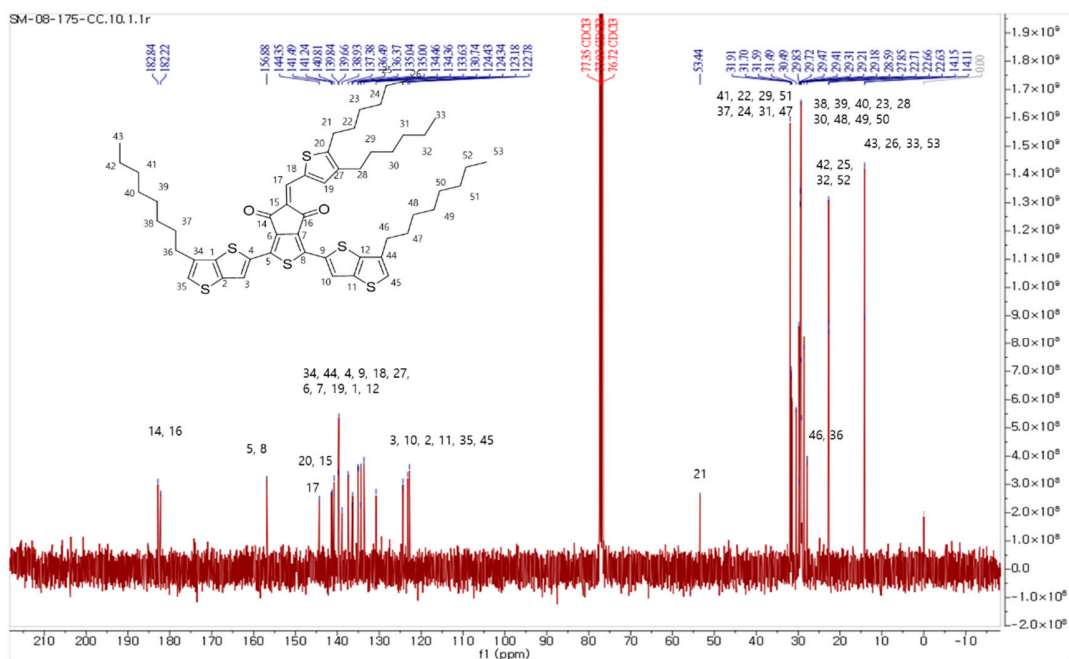

**Figure S20.** (<sup>13</sup>C NMR spectrum of compound 8).

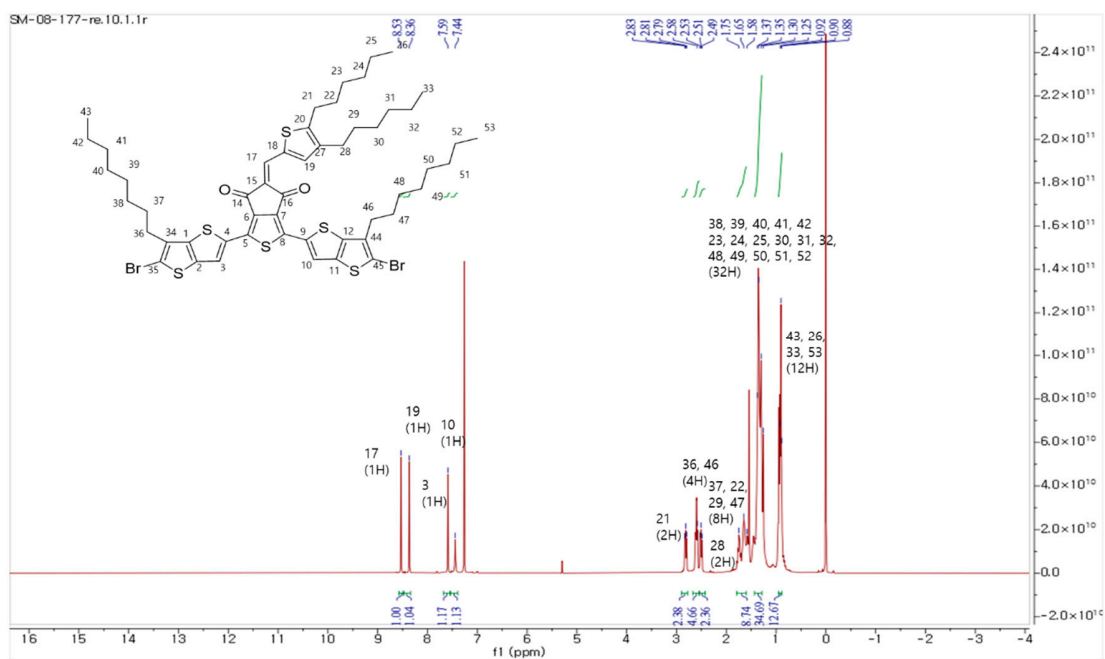

**Figure S21.** (<sup>1</sup>H NMR spectrum of compound M3).

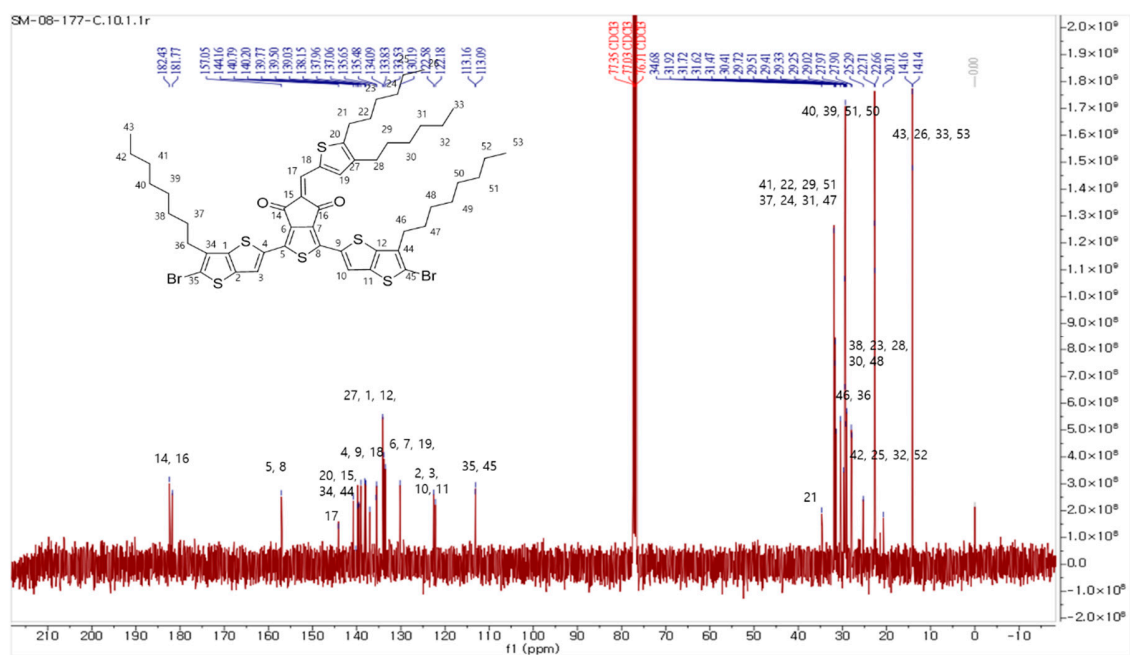

**Figure S22.** ( $^{13}\text{C}$  NMR spectrum of compound M3).

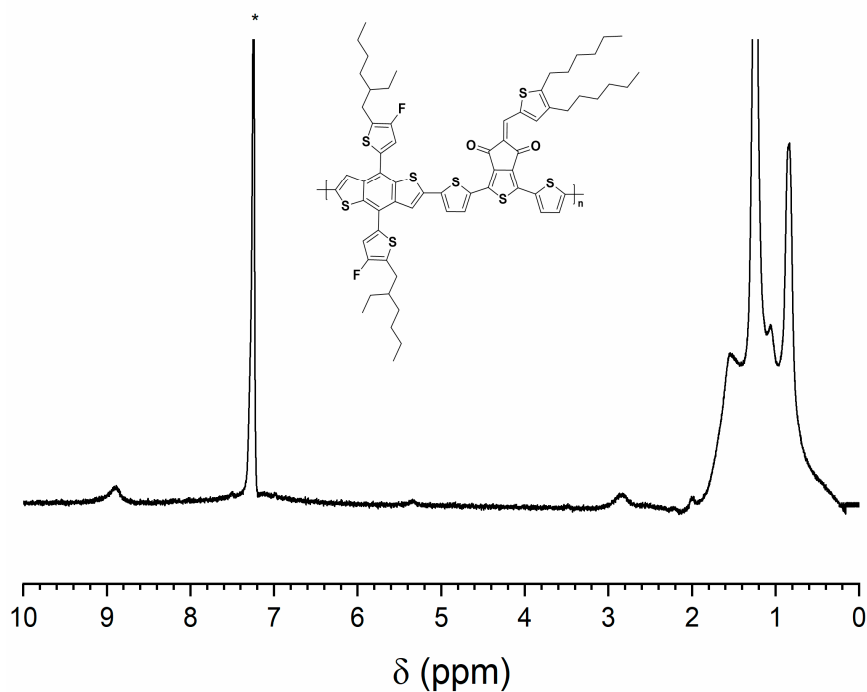

**Figure S23.** ( $^1\text{H}$  NMR spectrum of IND-T-BDTF).

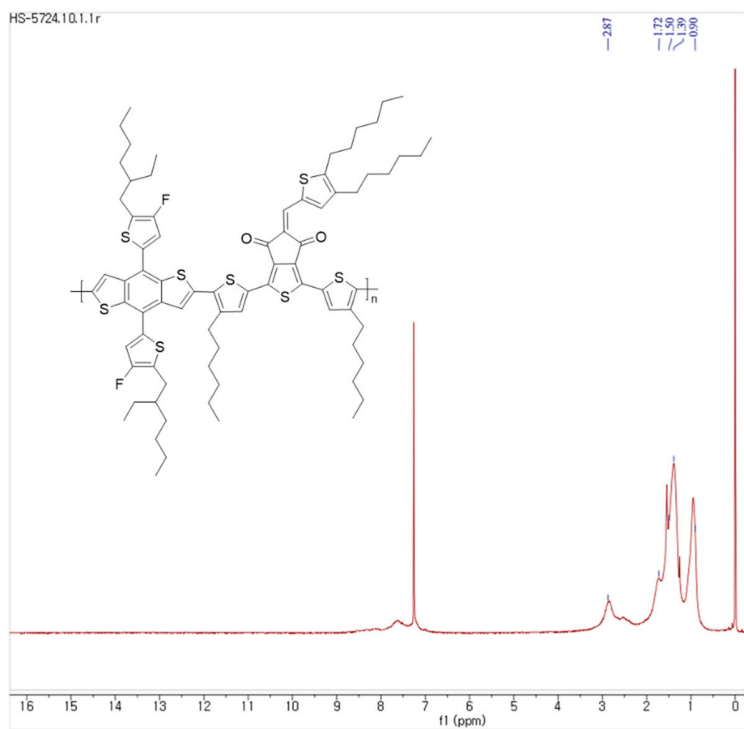

**Figure S24.** ( $^1\text{H}$  NMR spectrum of IND-HT-BDTF).

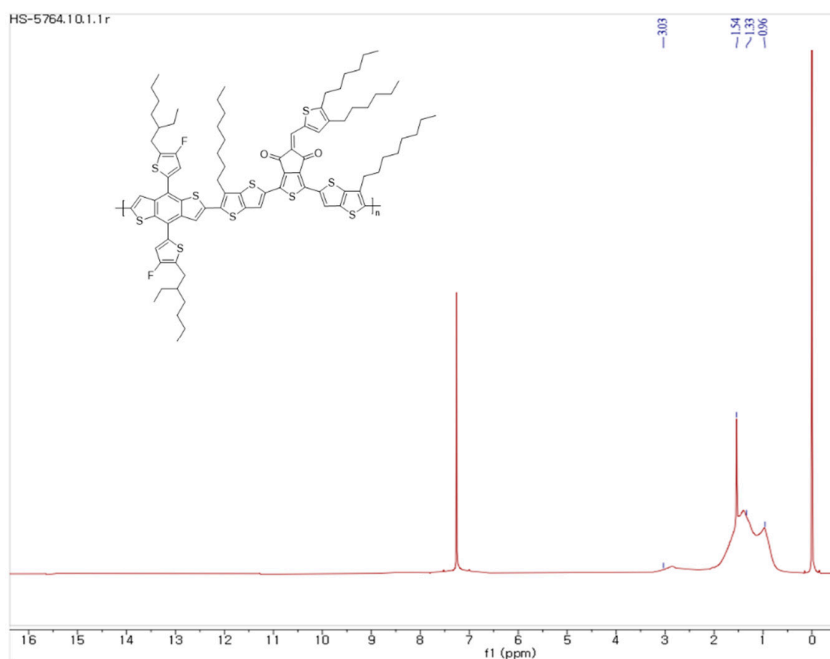

**Figure S25.** ( $^1\text{H}$  NMR spectrum of IND-OTT-BDTF).

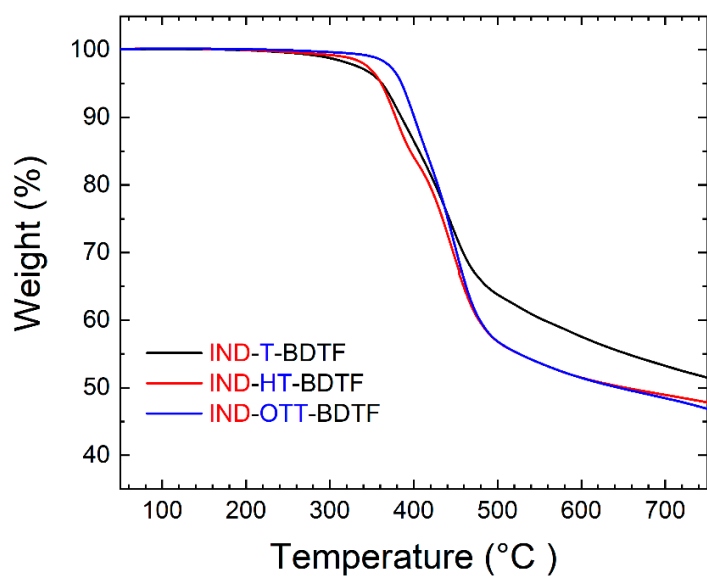

**Figure S26.** TGA thermograms of IND-T-BDTF, IND-HT-BDTF, and IND-OTT-BDTF.

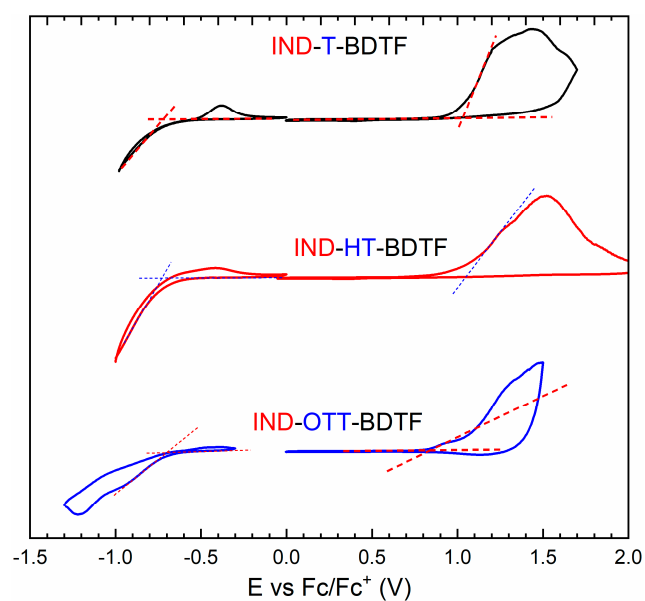

**Figure S27.** CV curves of (a) the reduction cycles and (b) the oxidation cycles of IND-T-BDTF, IND-HT-BDTF, and IND-OTT-BDTF.

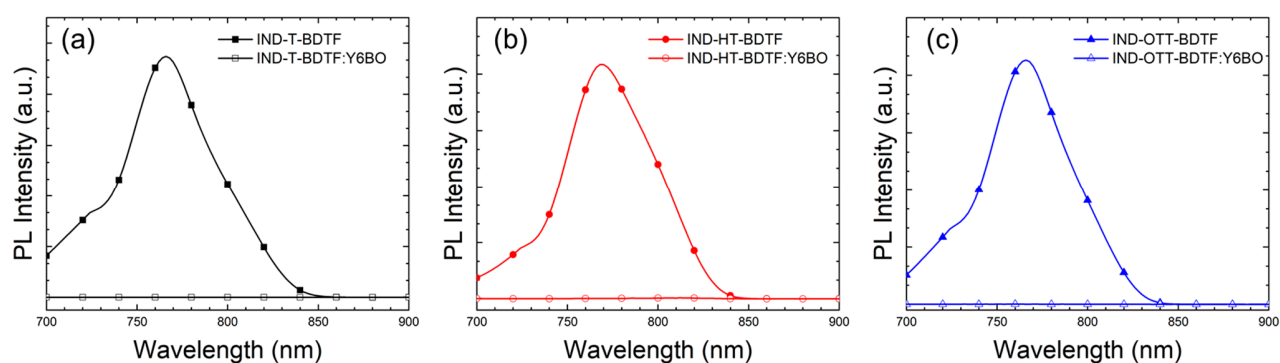

**Figure S28.** PL spectra of the polymers and their blend films with Y6BO acceptor: (a) IND-T-BDTF, (b) IND-HT-BDTF, and (c) IND-OTT-BDTF.

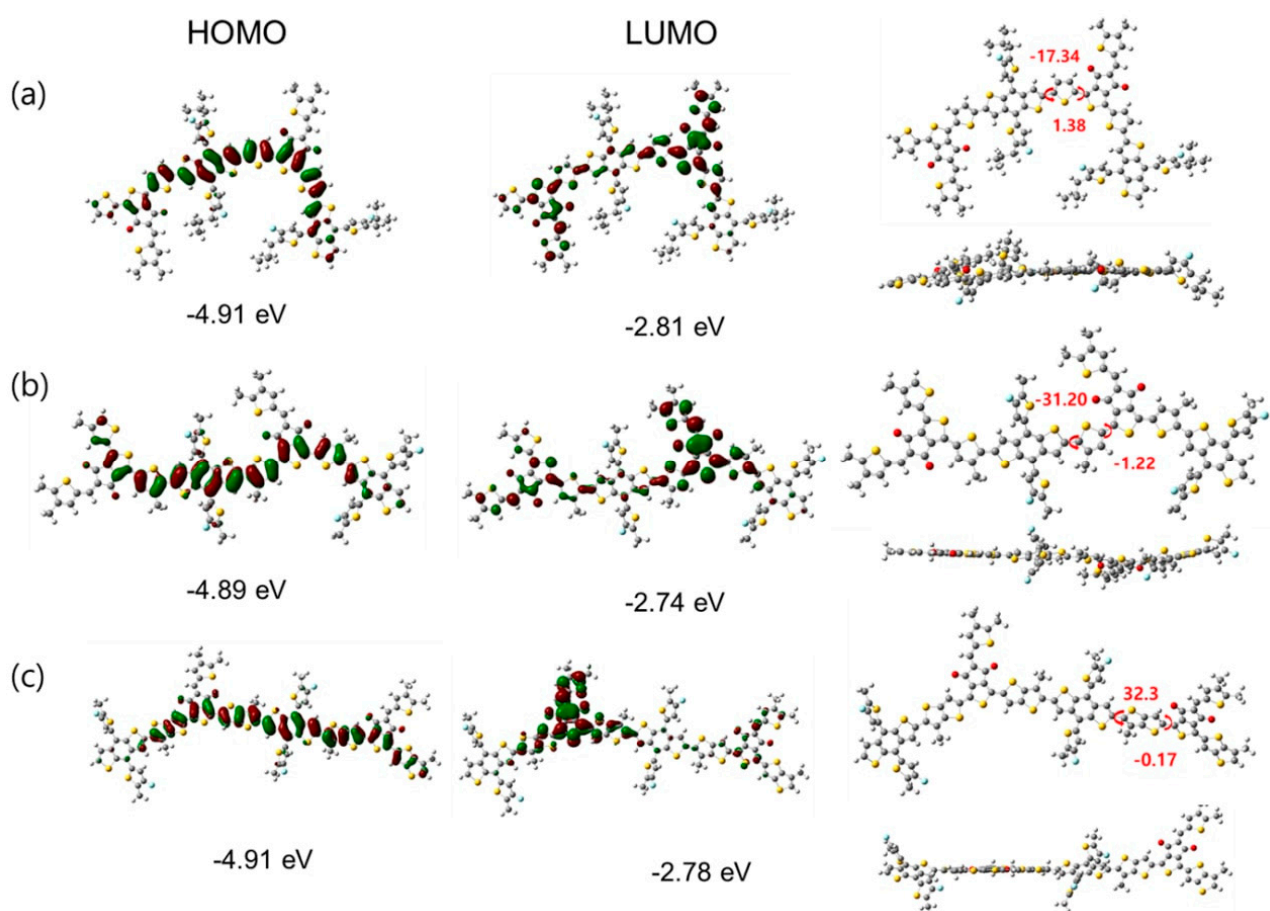

**Figure S29.** Frontier molecular orbitals of a two-repeating unit model compound at optimized geometry obtained from B3LYP/6-31G\*\* level for (a) IND-T-BDTF, (b) IND-HT-BDTF, IND-OTT-BDTF.

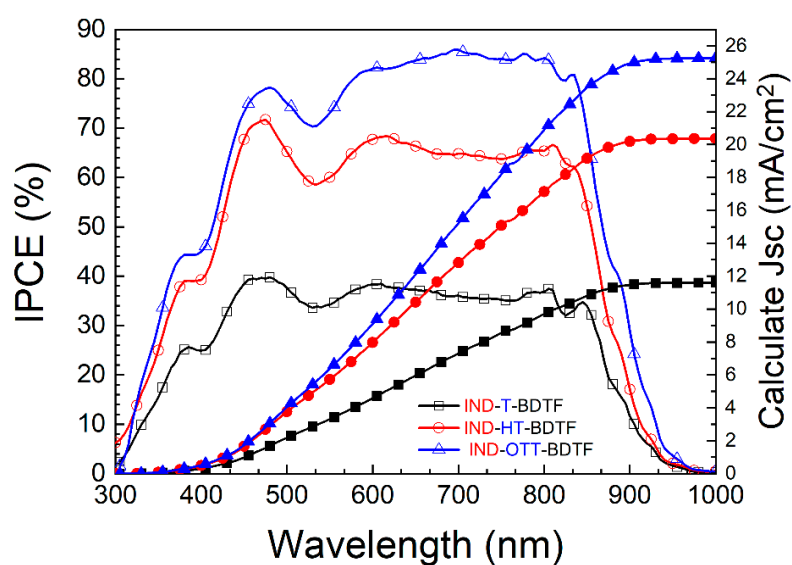

**Figure S30.** The IPCE spectra of the PSCs based on IND-T-BDTF, IND-HT-BDTF, and IND-OTT-BDTF.

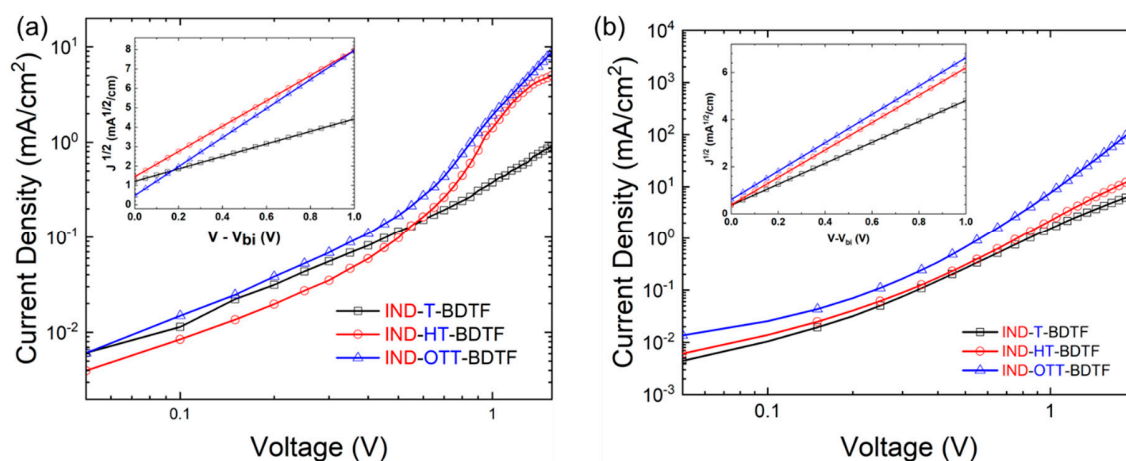

**Figure S31.**  $J$ - $V$  curves of (a) hole- and (b) electron-only devices (inset: current density vs. voltage – built-in voltage ( $V_{bi}$ ) curves with fitted lines).



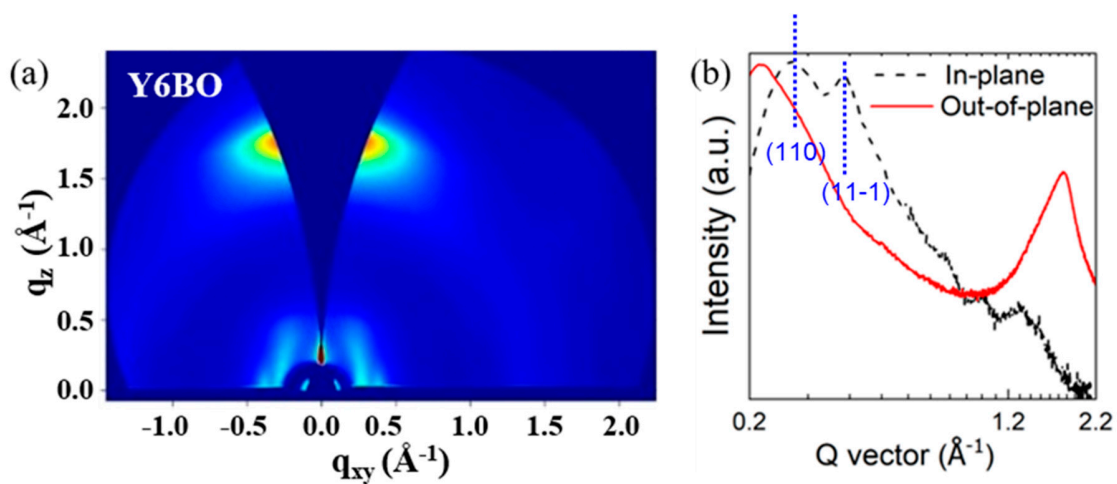

**Figure S32.** (a) GIWAXS image of pristine Y6BO film and (b) the corresponding line-cuts in the in-plane and out-of-plane direction.

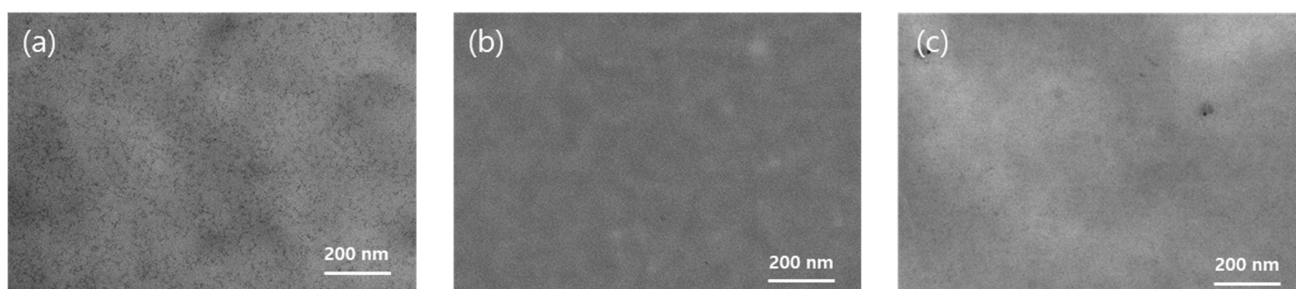

**Figure S33.** TEM images of the active layer based on (a) IND-T-BDTE, (b) IND-HT-BDTE, (c) IND-OTT-BDTE.

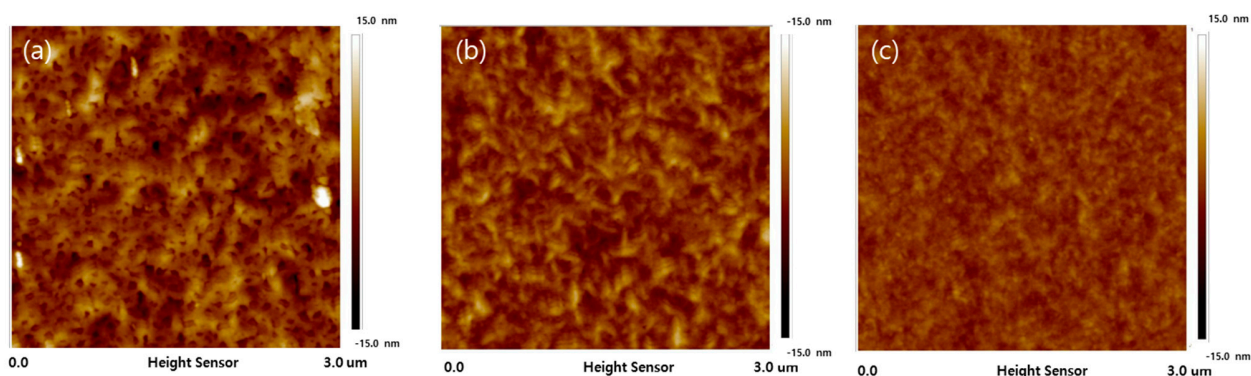

**Figure S34.** AFM images of the active layer based on (a) IND-T-BDTF, (b) IND-HT-BDTF, (c) IND-OTT-BDTF.

**Table S1.** The best photovoltaic parameters of the PSCs based on Y6BO. The average (10 devices are averaged) values for the photovoltaic parameters of each device are also provided in parentheses.

|            | Blend Ratio | Thickness (nm) | $J_{sc}$ (mA/cm <sup>2</sup> ) | $V_{oc}$ (V)   | FF (%)          | PCE (%)        |
|------------|-------------|----------------|--------------------------------|----------------|-----------------|----------------|
| PM6        | 1 : 1.2     | (90nm)         | 26.4<br>(26.2)                 | 0.82<br>(0.82) | 68.2<br>(68.2)  | 14.7<br>(14.6) |
|            | 3 : 3       | (100nm)        | 9.49<br>(9.23)                 | 0.78<br>(0.78) | 34.8<br>(34.75) | 2.58<br>(2.50) |
|            | 3 : 4       | (130nm)        | 11.85<br>(11.80)               | 0.80<br>(0.80) | 33.5<br>(33.45) | 3.18<br>(3.14) |
|            | 3 : 5       | (146nm)        | 9.36<br>(8.96)                 | 0.79<br>(0.79) | 35.1<br>(35.25) | 2.59<br>(2.49) |
| IND-T-BDTF | 3 : 6       | (180nm)        | 8.95<br>(8.76)                 | 0.79<br>(0.79) | 34.8<br>(35.10) | 2.46<br>(2.42) |
|            |             | (138nm)        | 9.03<br>(8.97)                 | 0.79<br>(0.78) | 36.0<br>(36.07) | 2.54<br>(2.52) |
|            | 3 : 4       | (110nm)        | 10.07<br>(9.65)                | 0.79<br>(0.79) | 35.5<br>(35.35) | 2.82<br>(2.73) |

|              |       |         |                  |                  |                  |                  |                  |
|--------------|-------|---------|------------------|------------------|------------------|------------------|------------------|
|              |       |         | (98nm)           | 9.58<br>(9.29)   | 0.78<br>(0.78)   | 36.2<br>(36.30)  | 2.70<br>(2.63)   |
| IND-HT-BDTF  | 3 : 3 | (86nm)  | 18.48<br>(18.18) | 0.85<br>(0.84)   | 37.90<br>(37.90) | 5.92<br>(5.79)   |                  |
|              | 3 : 4 | (118nm) | 21.92<br>(21.75) | 0.87<br>(0.87)   | 37.90<br>(37.68) | 7.23<br>(7.11)   |                  |
|              | 3 : 5 | (148nm) | 17.98<br>(17.52) | 0.83<br>(0.83)   | 39.95<br>(40.00) | 5.98<br>(5.81)   |                  |
|              | 3 : 6 | (194nm) | 17.33<br>(16.74) | 0.84<br>(0.83)   | 37.50<br>(37.65) | 5.46<br>(5.25)   |                  |
|              |       | (121nm) | 21.13<br>(20.84) | 0.86<br>(0.86)   | 36.15<br>(35.62) | 6.57<br>(6.38)   |                  |
|              | 3 : 4 | (108nm) | 18.88<br>(18.69) | 0.87<br>(0.86)   | 38.05<br>(38.87) | 6.58<br>(6.38)   |                  |
|              |       | (95nm)  | 18.97<br>(18.11) | 0.86<br>(0.86)   | 40.70<br>(41.05) | 6.64<br>(6.36)   |                  |
|              |       |         |                  |                  |                  |                  |                  |
| IND-OTT-BDTF | 3 : 3 | (105nm) | 23.02<br>(22.42) | 0.80<br>(0.80)   | 56.7<br>(56.23)  | 10.40<br>(10.07) |                  |
|              | 3 : 4 | (117nm) | 26.37<br>(25.21) | 0.79<br>(0.79)   | 56.2<br>(56.38)  | 11.69<br>(11.19) |                  |
|              | 3 : 5 | (132nm) | 23.94<br>(23.34) | 0.77<br>(0.77)   | 52.0<br>(51.48)  | 9.58<br>(9.25)   |                  |
|              | 3 : 6 | (148nm) | 22.35<br>(22.35) | 0.77<br>(0.77)   | 48.5<br>(50.85)  | 8.34<br>(8.29)   |                  |
|              |       | (138nm) | 23.8<br>(23.6)   | 0.79<br>(0.80)   | 57.9<br>(57.4)   | 10.90<br>(10.78) |                  |
|              | 3 : 4 | (126nm) | 23.98<br>(23.72) | 0.79<br>(0.80)   | 59.8<br>(58.85)  | 11.30<br>(11.10) |                  |
|              |       |         | (102nm)          | 23.81<br>(23.62) | 0.79<br>(0.79)   | 60.0<br>(59.63)  | 11.30<br>(11.18) |

|  |                   |                  |                |                 |                  |
|--|-------------------|------------------|----------------|-----------------|------------------|
|  | (117nm)<br>80 °C  | 24.20<br>(24.14) | 0.80<br>(0.80) | 54.2<br>(52.83) | 10.50<br>(10.20) |
|  | (117nm)<br>90 °C  | 24.24<br>(23.93) | 0.80<br>(0.79) | 53.4<br>(53.87) | 10.40<br>(10.23) |
|  | (117nm)<br>110 °C | 25.24<br>(24.85) | 0.78<br>(0.78) | 54.2<br>(53.55) | 10.70<br>(10.40) |
|  | (117nm)<br>120 °C | 24.23<br>(23.75) | 0.78<br>(0.78) | 56.1<br>(56.35) | 10.60<br>(10.43) |
